# Supplementary material for: Quantitative analysis of charge transfer plasmons in silver nanocluster dimers using semiempirical methods
Source: Royal Society of Chemistry journal article supplement (doi:10.1039/d4cp01393j), 2024-01-01
Supplement: d4cp01393j1.pdf [file d4cp01393j1.pdf]

## Supporting Information

### Quantitative Analysis of Charge Transfer Plasmons in Silver Nanocluster Dimers Using Semiempirical Methods

*Qiwei Sun,<sup>1</sup> Yavuz S. Ceylan,<sup>1,2</sup> Rebecca L. M. Giesecking<sup>1,\*</sup>*

*<sup>1</sup> Department of Chemistry, Brandeis University*

*415 South Street, Waltham, Massachusetts 02453*

*<sup>2</sup> Department of Chemistry, Massachusetts College of Liberal Arts*

*375 Church Street, North Adams, Massachusetts 01247*

\* Corresponding author: [giesecking@brandeis.edu](mailto:giesecking@brandeis.edu); Phone: (781)-736-2511

**Table S1. Composition of the strong longitudinal excited states of the end-to-end Ag<sub>4</sub> dimer into pure transitions. All transitions with weights > 5% are listed.**

| <b>Distance<br/>(Å)</b> | <b>Energy<br/>(eV)</b> | <b>Transition</b> | <b>Weight<br/>(%)</b> | <b>CTP<br/>character</b> |
|-------------------------|------------------------|-------------------|-----------------------|--------------------------|
| 3.5                     | 1.57                   | HOMO → LUMO       | 87.35                 | 11.96                    |
|                         |                        | HOMO-1 → LUMO+1   | 8.69                  | 7.04                     |
|                         | 2.60                   | HOMO-2 → LUMO     | 64.75                 | 5.36                     |
|                         |                        | HOMO-1 → LUMO+1   | 17.64                 | 7.04                     |
|                         |                        | HOMO-3 → LUMO+1   | 11.77                 | 4.66                     |
|                         | 4.0                    | 1.75              | HOMO → LUMO           | 79.91                    |
| HOMO-1 → LUMO+1         |                        |                   | 15.80                 | 4.76                     |
| 2.66                    |                        | HOMO-2 → LUMO     | 49.78                 | 3.34                     |
|                         |                        | HOMO-1 → LUMO+1   | 27.99                 | 4.76                     |
|                         |                        | HOMO-3 → LUMO+1   | 12.36                 | 2.84                     |
| 4.5                     |                        | 1.88              | HOMO → LUMO           | 69.39                    |
|                         | HOMO-1 → LUMO+1        |                   | 26.45                 | 2.97                     |
|                         | 2.72                   | HOMO-2 → LUMO     | 51.05                 | 1.89                     |
|                         |                        | HOMO-3 → LUMO+1   | 20.76                 | 1.68                     |
|                         |                        | HOMO-1 → LUMO+1   | 18.47                 | 2.97                     |
|                         | 5.0                    | 1.94              | HOMO → LUMO           | 60.20                    |
| HOMO-1 → LUMO+1         |                        |                   | 35.73                 | 1.73                     |
| 2.76                    |                        | HOMO-2 → LUMO     | 54.45                 | 1.00                     |
|                         |                        | HOMO-3 → LUMO+1   | 35.25                 | 0.94                     |
|                         |                        | HOMO-1 → LUMO+1   | 4.71                  | 1.73                     |

**Table S2. Composition of the excited states of the end-to-end Ag<sub>8</sub> dimer into excitations and CTP character of the pure excitations. All excitations with weights > 5% are listed.**

| <b>Distance<br/>(Å)</b> | <b>Energy<br/>(eV)</b> | <b>Transition</b> | <b>Weight<br/>(%)</b> | <b>CTP<br/>character (%)</b> |
|-------------------------|------------------------|-------------------|-----------------------|------------------------------|
| 3.5                     | 1.06                   | HOMO → LUMO       | 70.94                 | 8.27                         |
|                         |                        | HOMO-1 → LUMO+1   | 19.98                 | 3.80                         |
|                         | 1.91                   | HOMO-2 → LUMO     | 44.98                 | 6.38                         |
|                         |                        | HOMO-1 → LUMO+1   | 24.13                 | 3.80                         |
|                         |                        | HOMO → LUMO+2     | 11.99                 | 6.36                         |
|                         | HOMO-3 → LUMO+1        | 8.34              | 3.92                  |                              |
| 4.0                     | 1.16                   | HOMO → LUMO       | 62.68                 | 4.37                         |
|                         |                        | HOMO-1 → LUMO+1   | 28.57                 | 2.58                         |
|                         | 1.98                   | HOMO-2 → LUMO     | 47.23                 | 3.70                         |
|                         |                        | HOMO-1 → LUMO+1   | 17.64                 | 2.58                         |
|                         |                        | HOMO-3 → LUMO+1   | 14.60                 | 2.54                         |
|                         | HOMO → LUMO+2          | 8.75              | 3.96                  |                              |
| 4.5                     | 1.22                   | HOMO → LUMO       | 55.79                 | 2.22                         |
|                         |                        | HOMO-1 → LUMO+1   | 36.09                 | 1.60                         |
|                         | 2.04                   | HOMO-2 → LUMO     | 52.44                 | 1.97                         |
|                         |                        | HOMO-3 → LUMO+1   | 29.01                 | 1.54                         |
|                         |                        | HOMO-1 → LUMO+1   | 6.12                  | 1.60                         |
| 5.0                     | 1.25                   | HOMO → LUMO       | 51.40                 | 1.13                         |
|                         |                        | HOMO-1 → LUMO+1   | 40.82                 | 0.93                         |
|                         | 2.06                   | HOMO-2 → LUMO     | 50.49                 | 1.13                         |
|                         |                        | HOMO-3 → LUMO+1   | 38.34                 | 0.93                         |

**Table S3. Composition of the transverse excited states of the side-by-side Ag<sub>4</sub> dimer into excitations and CTP character of the pure excitations. All excitations with weights > 5% are listed.**

| Distance (Å)   | Energy (eV) | Transition       | Weight (%)      | CTP character (%) |
|----------------|-------------|------------------|-----------------|-------------------|
| 3.5            | 3.51        | HOMO-1 → LUMO+4  | 79.28           | 20.34             |
|                |             | HOMO-2 → LUMO    | 8.39            | 33.85             |
|                |             | HOMO → LUMO +1   | 4.94            | 44.50             |
|                | 2.68        | HOMO-2 → LUMO    | 74.17           | 33.85             |
|                |             | HOMO-1 → LUMO+4  | 14.68           | 20.34             |
|                |             | HOMO → LUMO +1   | 7.14            | 44.50             |
|                | 1.87        | HOMO → LUMO +1   | 84.66           | 44.50             |
|                |             | HOMO-2 → LUMO    | 12.01           | 33.85             |
|                | 4.0         | 3.96             | HOMO-1 → LUMO+4 | 50.48             |
| HOMO → LUMO +6 |             |                  | 40.56           | 13.59             |
| 4.17           |             | HOMO-3 → LUMO+1  | 69.72           | 1.01              |
|                |             | HOMO-2 → LUMO +3 | 15.9            | 0.39              |
| 4.5            | 4.51        | HOMO → LUMO +7   | 23.53           | 9.73              |
|                |             | HOMO-2 → LUMO+4  | 22.33           | 12.39             |
|                |             | HOMO-10 → LUMO   | 17.92           | 1.18              |
|                |             | HOMO-11 → LUMO+1 | 10.97           | 0.97              |
|                |             | HOMO-4 → LUMO+2  | 8.40            | 1.14              |
|                |             | HOMO-5 → LUMO+3  | 6.71            | 1.00              |
|                | 4.28        | HOMO-1 → LUMO +3 | 69.87           | 0.13              |
|                |             | HOMO-3 → LUMO+1  | 6.51            | 0.70              |
|                |             | HOMO → LUMO+2    | 5.52            | 0.03              |
| 5.0            | 4.87        | HOMO → LUMO+8    | 32.28           | 6.27              |
|                |             | HOMO-2 → LUMO +4 | 23.48           | 7.25              |
|                |             | HOMO-19 → LUMO+1 | 5.77            | 0.20              |
| 5.5            | 5.13        | HOMO → LUMO+9    | 41.10           | 3.66              |
|                |             | HOMO-2 → LUMO+6  | 26.50           | 4.85              |
|                |             | HOMO-1 → LUMO+15 | 12.62           | 3.67              |
|                |             | HOMO-3 → LUMO+10 | 7.71            | 4.86              |
| 6.0            | 5.22        | HOMO → LUMO+10   | 39.76           | 1.97              |
|                |             | HOMO-2 → LUMO+6  | 23.48           | 2.66              |
|                |             | HOMO-1 → LUMO+15 | 21.32           | 1.95              |
|                |             | HOMO-3 → LUMO+9  | 12.30           | 2.66              |

**Table S4. Composition of the transverse excited states of the side-by-side Ag<sub>8</sub> dimer into excitations and CTP character of the pure excitations. All excitations with weights > 5% are listed.**

| Distance (Å)     | Energy (eV)     | Transition       | Weight (%)      | CTP character (%) |
|------------------|-----------------|------------------|-----------------|-------------------|
| 3.5              | 3.62            | HOMO-3 → LUMO+7  | 28.28           | 22.31             |
|                  |                 | HOMO-1 → LUMO+5  | 24.11           | 3.97              |
|                  |                 | HOMO-2 → LUMO +8 | 19.26           | 19.94             |
|                  |                 | HOMO → LUMO+11   | 14.20           | 17.64             |
|                  | 3.77            | HOMO-6 → LUMO    | 51.67           | 4.82              |
|                  |                 | HOMO-5 → LUMO+2  | 18.69           | 2.38              |
|                  |                 | HOMO-1 → LUMO+5  | 5.02            | 3.97              |
|                  | 3.42            | HOMO-1 → LUMO+5  | 41.53           | 3.97              |
|                  |                 | HOMO-4 → LUMO+4  | 9.40            | 0.91              |
|                  |                 | HOMO → LUMO+10   | 7.51            | 1.70              |
|                  |                 | HOMO-3 → LUMO+7  | 7.03            | 22.31             |
|                  |                 | HOMO-2 → LUMO+8  | 6.35            | 19.94             |
|                  |                 | HOMO-3 → LUMO+3  | 5.16            | 0.90              |
|                  | 2.03            | HOMO → LUMO+3    | 71.25           | 0.65              |
|                  |                 | HOMO-1 → LUMO+2  | 10.54           | 42.27             |
|                  |                 | HOMO-2 → LUMO+1  | 7.62            | 1.48              |
|                  | 2.15            | HOMO-1 → LUMO+2  | 81.53           | 42.27             |
|                  |                 | HOMO → LUMO+3    | 9.95            | 0.65              |
| 2.49             | HOMO-4 → LUMO   | 89.29            | 35.26           |                   |
|                  | HOMO-5 → LUMO+2 | 3.52             | 2.38            |                   |
| 4.0              | 4.09            | HOMO-4 → LUMO+7  | 26.62           | 18.35             |
|                  |                 | HOMO-2 → LUMO+9  | 18.66           | 16.34             |
|                  |                 | HOMO-1 → LUMO+11 | 14.13           | 14.32             |
|                  |                 | HOMO-1 → LUMO+10 | 9.92            | 0.93              |
|                  |                 | HOMO-2 → LUMO+6  | 9.20            | 0.16              |
|                  |                 | HOMO-4 → LUMO+4  | 5.11            | 0.88              |
|                  | 2.00            | HOMO-3 → LUMO    | 60.05           | 41.98             |
|                  |                 | HOMO-2 → LUMO+1  | 17.61           | 1.62              |
|                  |                 | HOMO → LUMO+2    | 14.12           | 48.98             |
|                  | 1.54            | HOMO → LUMO+2    | 78.19           | 48.98             |
|                  |                 | HOMO-3 → LUMO    | 16.67           | 41.98             |
|                  | 4.5             | 4.57             | HOMO-4 → LUMO+8 | 15.21             |
| HOMO-3 → LUMO+10 |                 |                  | 12.13           | 11.93             |
| HOMO → LUMO+18   |                 |                  | 10.98           | 9.05              |
| HOMO-1 → LUMO+12 |                 |                  | 10.10           | 10.49             |
| HOMO-1 → LUMO+9  |                 |                  | 6.10            | 0.23              |
| HOMO-4 → LUMO+4  |                 |                  | 6.05            | 0.26              |
| HOMO → LUMO +13  |                 |                  | 5.30            | 0.43              |
| 4.47             |                 | HOMO-35 → LUMO+1 | 11.05           | 0.71              |

|     |      |                  |       |      |
|-----|------|------------------|-------|------|
|     |      | HOMO-6 → LUMO+4  | 8.43  | 0.58 |
|     |      | HOMO-16 → LUMO+3 | 6.41  | 1.17 |
|     |      | HOMO-1 → LUMO+10 | 6.20  | 0.23 |
|     |      | HOMO-34 → LUMO+2 | 6.15  | 0.73 |
|     |      | HOMO → LUMO+14   | 5.63  | 0.43 |
|     |      | HOMO-4 → LUMO+5  | 5.33  | 0.26 |
| 5.0 | 5.01 | HOMO → LUMO +19  | 21.24 | 5.81 |
|     |      | HOMO-5 → LUMO+9  | 20.52 | 8.83 |
|     |      | HOMO-2 → LUMO+15 | 17.19 | 6.77 |
|     |      | HOMO-3 → LUMO+11 | 16.49 | 7.76 |
| 5.5 | 5.24 | HOMO-7 → LUMO+5  | 14.57 | 0.06 |
|     |      | HOMO → LUMO+25   | 12.65 | 3.36 |
|     |      | HOMO-5 → LUMO+10 | 9.11  | 5.32 |
|     |      | HOMO → LUMO+12   | 8.96  | 0.02 |
|     |      | HOMO-2 → LUMO+17 | 8.41  | 3.95 |
|     |      | HOMO-4 → LUMO+11 | 7.59  | 4.54 |
|     |      | HOMO-6 → LUMO+7  | 5.80  | 0.02 |
| 6.0 | 5.35 | HOMO → LUMO+26   | 21.96 | 1.77 |
|     |      | HOMO-6 → LUMO+10 | 14.61 | 2.90 |
|     |      | HOMO-2 → LUMO+19 | 13.97 | 2.12 |
|     |      | HOMO-4 → LUMO+13 | 11.56 | 2.46 |
|     |      | HOMO-1 → LUMO+29 | 11.40 | 1.66 |
|     |      | HOMO-3 → LUMO+25 | 7.50  | 2.13 |
|     |      | HOMO-7 → LUMO+18 | 7.09  | 2.89 |
|     |      | HOMO-5 → LUMO+20 | 5.90  | 2.48 |

**Table S5. Breakdown of the main absorption states in the side-by-side Ag<sub>31</sub><sup>+</sup> dimers with their excited-state energies and oscillator strengths. States listed meet the criteria of oscillator strength: > 2.0 for longitudinal states, > 1.5 for in-plane transverse states, and the two highest for out-of-plane transverse states.**

| Distance (Å) | Longitudinal |                         | In-plane Transverse |                         | Out-of-plane Transverse |                         |
|--------------|--------------|-------------------------|---------------------|-------------------------|-------------------------|-------------------------|
|              | Energy (eV)  | Oscillator Strength (f) | Energy (eV)         | Oscillator Strength (f) | Energy (eV)             | Oscillator Strength (f) |
| 3.5          | 3.59         | 3.927                   | 3.39                | 2.663                   | 4.84                    | 2.604                   |
|              | 3.61         | 4.891                   | 3.77                | 4.613                   | 5.23                    | 6.141                   |
|              | 3.65         | 5.731                   | 3.78                | 2.052                   |                         |                         |
| 4.0          | 3.59         | 4.590                   | 3.61                | 1.609                   | 4.82                    | 4.902                   |
|              | 3.71         | 2.556                   | 3.83                | 2.161                   | 5.20                    | 1.647                   |
|              | 3.73         | 3.920                   | 3.89                | 1.542                   |                         |                         |
| 4.5          | 3.48         | 9.949                   | 3.82                | 2.751                   | 4.79                    | 2.611                   |
|              | 3.71         | 2.392                   | 4.04                | 2.276                   | 4.82                    | 1.972                   |
| 5.0          | 3.30         | 2.527                   | 4.05                | 2.363                   | 4.28                    | 4.913                   |
|              | 3.70         | 21.664                  | 4.16                | 3.453                   | 4.80                    | 8.554                   |
| 5.5          | 3.68         | 10.900                  | 4.12                | 2.577                   | 4.28                    | 6.556                   |
|              | 3.69         | 11.551                  | 4.28                | 4.196                   | 4.79                    | 10.185                  |
|              |              |                         | 4.64                | 2.194                   |                         |                         |
| 6.0          | 3.67         | 7.675                   | 3.94                | 2.167                   | 4.28                    | 7.714                   |
|              | 3.68         | 18.298                  | 4.15                | 1.810                   | 4.79                    | 11.455                  |
|              |              |                         | 4.32                | 1.939                   |                         |                         |
|              |              |                         | 4.64                | 1.908                   |                         |                         |

**Table S6. Breakdown of the main absorption states in the side-by-side  $\text{Ag}_{31}^+$  dimers with their excited-state energies and oscillator strengths. Two states with highest oscillator strengths from each transition category are listed.**

| Distance (Å) | Longitudinal |                         | In-plane Transverse |                         | Out-of-plane Transverse |                         |
|--------------|--------------|-------------------------|---------------------|-------------------------|-------------------------|-------------------------|
|              | Energy (eV)  | Oscillator Strength (f) | Energy (eV)         | Oscillator Strength (f) | Energy (eV)             | Oscillator Strength (f) |
| 3.5          | 3.60         | 11.545                  | 3.45                | 4.806                   | 4.78                    | 3.754                   |
|              | 3.71         | 4.692                   | 3.79                | 3.882                   | 4.90                    | 2.901                   |
| 4.0          | 3.57         | 9.591                   | 3.78                | 2.860                   | 4.86                    | 3.934                   |
|              | 3.66         | 7.485                   | 3.79                | 3.843                   | 5.20                    | 4.817                   |
| 4.5          | 3.68         | 14.284                  | 3.63                | 1.509                   | 4.30                    | 4.500                   |
|              | 3.71         | 6.304                   | 3.75                | 1.729                   | 4.79                    | 11.514                  |
| 5.0          | 3.67         | 11.593                  | 3.88                | 3.255                   | 4.29                    | 3.870                   |
|              | 3.69         | 12.811                  | 4.24                | 4.536                   | 4.79                    | 11.663                  |
| 5.5          | 3.67         | 18.618                  | 3.91                | 1.669                   | 4.29                    | 8.795                   |
|              | 3.68         | 7.867                   | 4.31                | 4.301                   | 4.79                    | 11.350                  |
| 6.0          | 3.66         | 23.547                  | 4.35                | 3.567                   | 4.28                    | 9.747                   |
|              | 3.68         | 3.571                   | 4.75                | 2.624                   | 4.79                    | 11.098                  |
